# Supplementary material
Source: publisher figshare collection journal article supplement (https://asha.figshare.com/ndownloader/files/11161040)
Supplement: Supplementary file 1 [file 11161040]

**Supplemental material.** Pearson correlations: Child and parent measures.

| Measure          | Child age | Child NV-IQ | SES   | Two-word English | Two-word Spanish | English Exposure | Spanish Exposure | Child Eng. RV | Child Eng. EV | Child Span. RV | Child Span. EV | PC NV-IQ | PC Eng. RV | PC Eng. EV | PC Span. RV | PC Span. EV |
|------------------|-----------|-------------|-------|------------------|------------------|------------------|------------------|---------------|---------------|----------------|----------------|----------|------------|------------|-------------|-------------|
| Child age        | —         | .117        | -.062 | -.075            | -.090            | .308*            | -.310*           | .203          | .118          | -.118          | -.193          | .157     | .120       | .143       | .118        | .147        |
| Child NV-IQ      |           | —           | .151  | -.177            | -.095            | .198             | -.202            | .448*         | .428*         | .377*          | .046           | .371*    | .321*      | .351**     | .250        | .343*       |
| SES              |           |             | —     | -.441**          | -.121            | .383**           | -.392**          | .676**        | .622**        | .122           | -.063          | .615**   | .718       | .670**     | .666**      | .288*       |
| Two-word English |           |             |       | —                | .184             | -.313*           | .318*            | -.555**       | -.453**       | -.095          | .133           | -.431**  | -.573**    | -.582**    | -.525**     | -.103       |
| Two-word Spanish |           |             |       |                  | —                | -.017            | .015             | -.191         | -.179         | -.360**        | -.123          | .132     | -.030      | -.033      | .091        | -.088       |
| English Exposure |           |             |       |                  |                  | —                | -.997**          | .601**        | .595**        | -.149          | -.422**        | .375**   | .489**     | .505**     | .161        | .110        |
| Spanish Exposure |           |             |       |                  |                  |                  | —                | -.604**       | -.592**       | .145           | .418           | -.385**  | -.490**    | -.502**    | -.193       | -.121       |
| Child Eng. RV    |           |             |       |                  |                  |                  |                  | —             | .863**        | .299*          | -.111          | .620**   | .781**     | .762**     | .498**      | .296*       |
| Child Eng. EV    |           |             |       |                  |                  |                  |                  |               | —             | .212           | -.153          | .566**   | .735**     | .691**     | .424**      | .268*       |
| Child Span. RV   |           |             |       |                  |                  |                  |                  |               |               | —              | .567**         | .103     | .094       | .089       | .187        | .182        |
| Child Span. EV   |           |             |       |                  |                  |                  |                  |               |               |                | —              | -.133    | -.182      | -.201      | .166        | .133        |
| Parent NV-IQ     |           |             |       |                  |                  |                  |                  |               |               |                |                | —        | .815**     | .690**     | .602**      | .358**      |
| PC Eng. RV       |           |             |       |                  |                  |                  |                  |               |               |                |                |          | —          | .910**     | .524**      | .241        |
| PC Eng. EV       |           |             |       |                  |                  |                  |                  |               |               |                |                |          |            | —          | .474**      | .189        |
| PC Span. RV      |           |             |       |                  |                  |                  |                  |               |               |                |                |          |            |            | —           | .463**      |
| PC Span. EV      |           |             |       |                  |                  |                  |                  |               |               |                |                |          |            |            |             | —           |

*Note.* NV-IQ = Nonverbal intelligence; SES = socioeconomic status; Two-word English/Spanish = age at which child produced two-word phrases in English/Spanish; RV = receptive vocabulary; EV = expressive vocabulary; PC = primary caregiver.

\*  $p < .05$ . \*\*  $p < .01$ .
